# Supplementary material for: Normality sensing licenses local T cells for innate-like tissue surveillance
Source: Springer Nature journal article supplement (doi:10.1038/s41590-021-01124-8), 2022-02-14
Supplement: MOESM1 [file 41590_2021_1124_MOESM1_ESM.pdf › 41590_2021_1124_MOESM1_ESM.pdf]

---

**Supplementary information**

---

**Normality sensing licenses local T cells for innate-like tissue surveillance**

---

In the format provided by the  
authors and unedited

## Supplementary Information

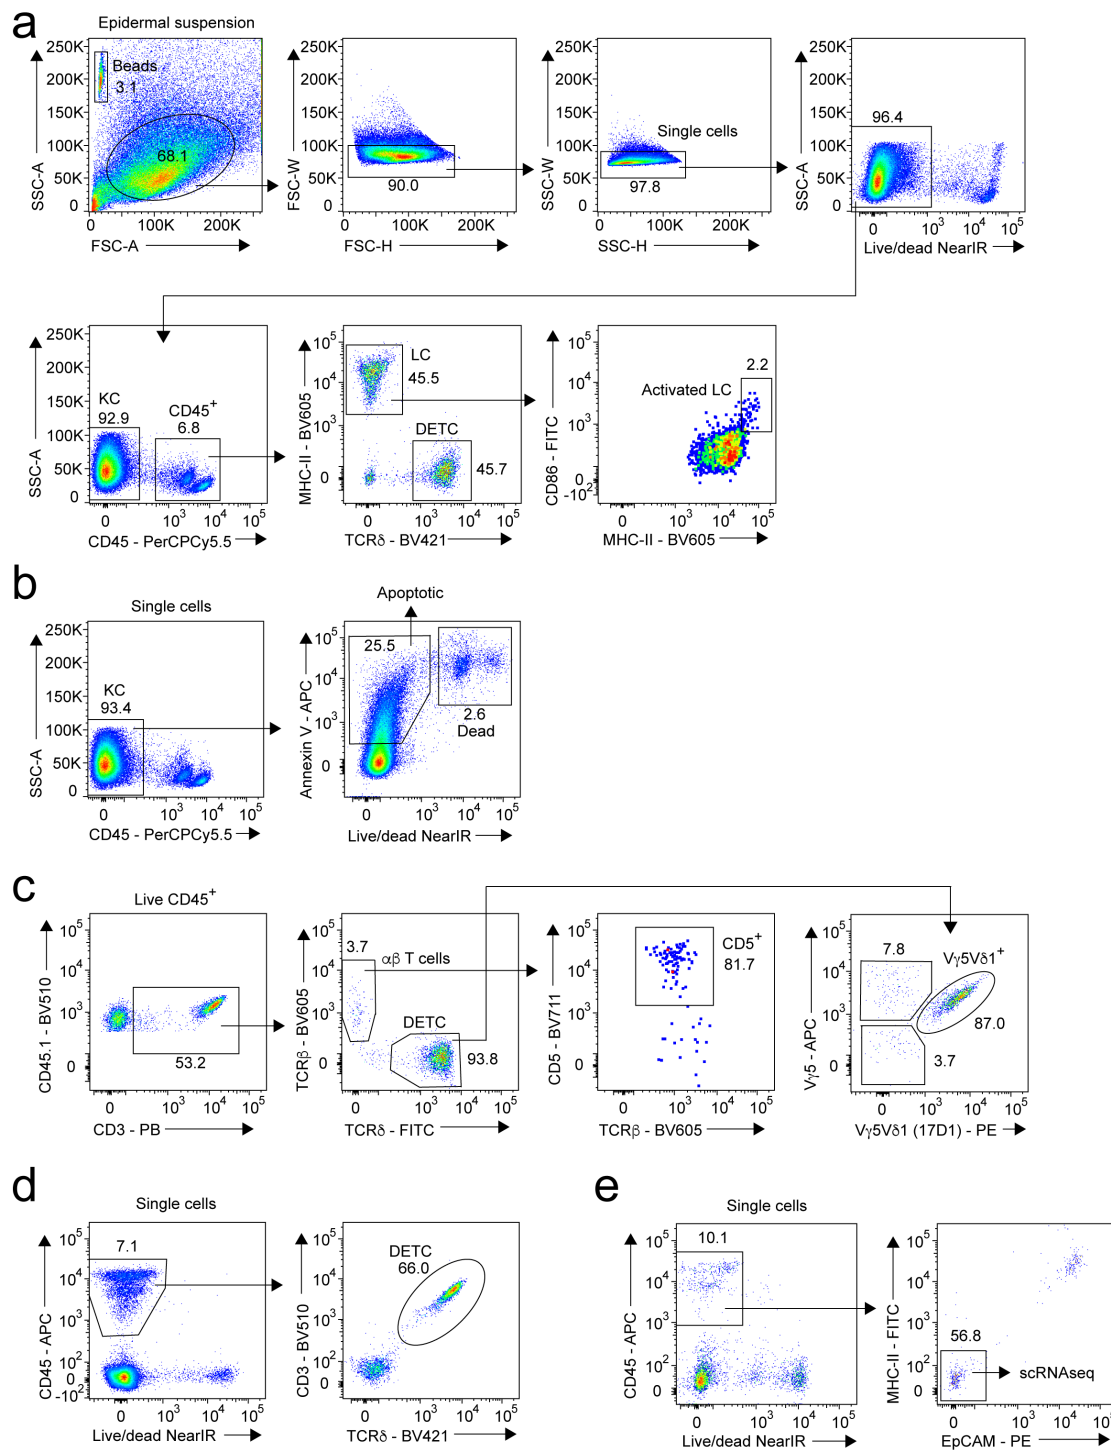

**Supplementary Figure 1: Flow cytometry gating strategies.** **a)** Gating of epidermal DETCs, LCs and KCs for quantification, phenotyping and sorting. **b)** Gating of KC for apoptosis analysis. **c)** Gating of epidermal T cells for TCR phenotyping. **d)** Gating for sorting or routine phenotyping of DETCs. **e)** Negative gating for sorting of epidermal T cells for scRNAseq. Exact fluorophores used were changed between individual experiments depending upon downstream phenotyping.

### Supplementary Table 1: Thymic Skint1 selection gene signature in DETCs.

Top 200 genes upregulated in wild-type vs FVB.Tac V $\gamma$ 5V $\delta$ 1<sup>+</sup> progenitors from E15-16 embryonic thymus as measured by Illumina microarray analysis, as published in Turchinovich & Hayday 2011 (ref. 35).

|                    |               |               |               |                 |
|--------------------|---------------|---------------|---------------|-----------------|
| ENO3               | EIF5          | UBE2K         | LOC100042405  | LSM3            |
| CTSW               | EIF4A2        | PFKP          | A230050P20RIK | LOC383712       |
| LOC100047353       | HNRNPH1       | CCND2         | ACAA2         | RPS15           |
| XCL1               | LOC626309     | UBLCP1        | GTPBP4        | SCL0001978.1_6  |
| EGR3               | BC003885      | GNA-RS1       | LOC433955     | RASA3           |
| ENSMUSG00000068790 | RNF19A        | SDCBP         | WDR75         | RPS27A          |
| PPIC               | CISH          | 2810026P18RIK | SH2D2A        | PPAN            |
| EPHX1              | ADD3          | SEPT12        | IGFBP7        | PTPN6           |
| HSPA1A             | NASP          | A930008A22RIK | 2810407C02RIK | CENTD3          |
| SCOTIN             | CD28          | GTF2F2        | LOC623453     | AP1M1           |
| RBBP7              | IRF2          | LOC100047651  | DNAJB1        | PGK1            |
| GADD45G            | LOC381738     | AK2           | ITM2A         | NUP205          |
| HNRNPA2B1          | TPM4          | SUMO1         | PPIF          | 2610101N10RIK   |
| ENDOD1             | E330016A19RIK | 9430008C03RIK | NIP7          | HIST2H2BE       |
| TAGAP              | LGALS1        | IGF2R         | ACTB          | IGF2            |
| LOC100048845       | DDIT4         | RABGGTB       | 1190002H23RIK | SEPT16          |
| VIM                | HSPA8         | SLC38A2       | TPI1          | HMGB2L1         |
| KLF2               | 2610029G23RIK | LOC433749     | BIRC5         | 1110012O05RIK   |
| LTB                | HSP105        | DARS          | CSNK2A2       | GSPT1           |
| PRKCH              | SNORA65       | UMPS          | LOC100041569  | UCK2            |
| RGS16              | ACADM         | SUMO3         | D030056L22RIK | ZFP330          |
| CHCHD10            | MAPRE1        | PLP2          | PGLYRP1       | EDF1            |
| 3300001P08RIK      | PGP           | SFXN1         | MLF2          | SCL0002315.1_12 |
| MYO1G              | ZFP36L1       | NDFIP1        | 2310008M10RIK | AKR1C12         |
| NFKBID             | EIF4G2        | PPP2CA        | LMNA          | LCP1            |
| KLHDC2             | ANXA2         | GLIPR2        | HDGF          | MTDNA_ND2       |
| HSPD1              | RWDD1         | PRICKLE3      | HIP2          | SEC11A          |
| NT5E               | NACA          | A130082M07RIK | GNL3          | CYP51           |
| BTG1               | MSN           | ADSS          | LOC100048037  | EZH2            |
| ZYX                | LOC329750     | ZRANB2        | HIST1H4A      | PPTC7           |
| CYTIP              | EMP3          | MORF4L1       | LOC381398     | MOBK1B          |
| PKP4               | LOC331102     | PDLIM1        | AKR1C18       | VDAC3           |
| CD160              | HSPA1B        | UCHL5         | MCM7          | GEMIN6          |
| PRR13              | H19           | NFKBIA        | D19BWG1357E   | COQ5            |
| AI850995           | SMN1          | HSF1          | EIF5A         | ARPC5           |
| EG434858           | ISY1          | MED14         | CD9           | 0610007J10RIK   |
| TPM3               | MYL6          | ELK3          | CD69          | HIST1H3D        |
| NRGN               | IVNS1ABP      | SLC35C1       | LOC100047834  | PRRC1           |
| LOC671878          | SLC29A1       | SHMT1         | ZNFN1A3       | MKI67IP         |
| CLK1               | LOC100045617  | ZDHHC6        | EHD4          | NFYB            |

**Supplementary Table 2: Induction of TNF superfamily receptors by Skint1 selection of DETCs.**

Expression of TNF superfamily receptors in wild-type vs FVB.Tac V $\gamma$ 5V $\delta$ 1<sup>+</sup> progenitors from E15-16 embryonic thymus. Gene expression was measured by Illumina microarray analysis, as published in Turchinovich & Hayday 2011 (ref. 35).

| Gene             | Mean signal wild-type | Mean signal FVB.Tac | Fold change wild-type:<br>FVB.Tac |
|------------------|-----------------------|---------------------|-----------------------------------|
| <i>Tnfrsf9</i>   | 334.62615             | 88.57383            | 3.77793475                        |
| <i>Tnfrsf18</i>  | 453.9273              | 121.3864            | 3.73952354                        |
| <i>Tnfrsf4</i>   | 204.0369              | 98.90794            | 2.06289707                        |
| <i>Tnfrsf13b</i> | 237.4174              | 119.32379           | 1.9896904                         |
| <i>Tnfrsf22</i>  | 198.17855             | 103.077795          | 1.92261146                        |
| <i>Tnfrsf1b</i>  | 141.3792              | 93.73878            | 1.5082253                         |
| <i>Tnfrsf12a</i> | 145.4694              | 102.3394            | 1.42144081                        |
| <i>Tnfrsf13c</i> | 105.0007              | 76.09886            | 1.37979334                        |
| <i>Tnfrsf19</i>  | 135.2836              | 111.1403            | 1.21723263                        |
| <i>Tnfrsf21</i>  | 166.61825             | 138.140765          | 1.20614831                        |
| <i>Tnfrsf1a</i>  | 109.2932              | 95.17151            | 1.14838149                        |
| <i>Tnfrsf25</i>  | 159.9612              | 144.9653            | 1.10344476                        |
| <i>Tnfrsf10b</i> | 157.8602              | 177.2649            | 0.89053276                        |

**Supplementary Table 3: Antibodies and similar reagents used in flow cytometry, imaging and ELISA.**

| <b>Reagent</b>                            | <b>Source</b>        | <b>Identifier</b>          | <b>Dilution</b>    |
|-------------------------------------------|----------------------|----------------------------|--------------------|
| anti-CD16/CD32 Fc block                   | BD                   | Cat#553141                 | 1:200              |
| anti-CD3 BV510 (17A2)                     | BioLegend            | Cat#100234                 | 1:300              |
| anti-CD3 FITC (2C11)                      | BD                   | Cat#553061                 | 1:300              |
| anti-CD3 Pacific Blue (17A2)              | BioLegend            | Cat#100214                 | 1:200              |
| anti-CD3 PE (2C11)                        | BioLegend            | Cat#100308                 | 1:300              |
| anti-CD3 PerCPCy5.5 (17A2)                | BioLegend            | Cat#100218                 | 1:300              |
| anti-CD5 BV711 (53-7.3)                   | BD                   | Cat# 740649                | 1:300              |
| anti-CPDs (TDM-2)                         | Cosmo Bio            | Cat#CAC-NM-DND-001         | 1:1000             |
| anti-CD45 APC (30-F11)                    | BioLegend            | Cat#103112                 | 1:300              |
| anti-CD45 FITC (30-F11)                   | BioLegend            | Cat#103108                 | 1:300              |
| anti-CD45 Pacific Blue (30-F11)           | BioLegend            | Cat#103126                 | 1:300              |
| anti-CD45 PerCPCy5.5 (30-F11)             | BioLegend            | Cat#103132                 | 1:300              |
| anti-CD45.1 BV510 (A20)                   | BioLegend            | Cat#110741                 | 1:300              |
| anti-CD69 PE (H1.2F3)                     | eBioscience          | Cat#12-0691-83             | 1:300              |
| anti-CD69 PECy7 (H1.2F3)                  | BioLegend            | Cat#104512                 | 1:300              |
| anti-CD86 APC (GL-1)                      | BioLegend            | Cat#105012                 | 1:300              |
| anti-CD86 FITC (GL-1)                     | BioLegend            | Cat# 105006                | 1:300              |
| anti-CD122 PE (TM- $\beta$ 1)             | BioLegend            | Cat#123210                 | 1:300              |
| anti-CD137 (4-1BB) (158321)               | R&D Systems          | Cat#MAB9371-500            | 0.2mg/ml (in vivo) |
| anti-CD137 (4-1BB) APC (17B5)             | BioLegend            | Cat#106110                 | 1:300              |
| anti-CD137 (4-1BB) PE (17B5)              | BioLegend            | Cat#106106                 | 1:300              |
| InVivoMab anti-CD137L (4-1BBL) (TKS-1)    | BioXCell             | Cat#BE0110-1MG             | 1mg/ml (in vivo)   |
| InVivoMab anti-GITR (DTA-1)               | BioXCell             | Cat#BE0063-1MG             | 0.2mg/ml (in vivo) |
| anti-EpCAM (CD326) PE (G8.8)              | eBioscience          | Cat#12-5791-82             | 1:300              |
| anti-GITR APC (DTA-1)                     | BioLegend            | Cat#126311                 | 1:300              |
| LEAF purified anti-GITRL (5F1)            | BioLegend            | Cat#147404                 | 1mg/ml (in vivo)   |
| anti-I-A/I-E (MHC-II) AF647 (M5/114.15.2) | BioLegend            | Cat#107618                 | 1:500              |
| anti-I-A/I-E (MHC-II) BV605 (M5/114.15.2) | BioLegend            | Cat#107639                 | 1:300              |
| anti-I-A/I-E (MHC-II) FITC (M5/114.15.2)  | BioLegend            | Cat#107606                 | 1:300              |
| anti-IgM PE (HIS40)                       | eBioscience          | Cat#12-0990-82             | 1:200              |
| anti-mouse IgG biotin (polyclonal)        | Invitrogen           | Cat#62-6540                | 1:1000             |
| anti-rat IgG AF568 (polyclonal)           | Invitrogen           | Cat#A-11077                | 1:400              |
| anti-Skint1 (2G2)                         | Helmholtz Monoclonal | Salim et al 2016 (ref. 19) | 1:100 (iSIM)       |

|                                                         |                       |                                    |                          |
|---------------------------------------------------------|-----------------------|------------------------------------|--------------------------|
|                                                         | Antibody Facility     |                                    | 1mg/ml (in vivo)         |
| anti-TCR $\beta$ BV605 (H57-597)                        | BD                    | Cat# 562840                        | 1:300                    |
| anti-TCR $\delta$ (GL3) AF647                           | BioLegend             | Cat#118134                         | 1:300                    |
| anti-TCR $\delta$ (GL3) APC                             | BioLegend             | Cat#118116                         | 1:300                    |
| anti-TCR $\delta$ (GL3) BV421                           | BioLegend             | Cat#118119                         | 1:300                    |
| anti-TCR $\delta$ (GL3) FITC                            | BioLegend             | Cat#118106                         | 1:300                    |
| anti-TCR $\delta$ (GL3) PerCPeFluor710                  | eBioscience           | Cat#46-5711-82                     | 1:300                    |
| anti-V $\gamma$ 5 (536) APC                             | BioLegend             | Cat#137506                         | 1:300 (FC)<br>1:100 (IF) |
| anti-V $\gamma$ 5 (536) FITC                            | BD                    | Cat#553229                         | 1:300                    |
| anti-V $\gamma$ 5V $\delta$ 1 (17D1)                    | R. Tigelaar, J. Lewis | Mallick-Wood et al. 1998 (ref. 55) | Neat (S/N)               |
| anti- $\gamma$ H2A.X FITC (JBW301)                      | Sigma-Aldrich         | Cat#16-202A                        | 1:100                    |
| Ultra-LEAF purified rat IgG2a isotype control (RTK2758) | BioLegend             | Cat#400565                         | 0.2-1mg/ml (in vivo)     |
| InVivoMab rat IgG2b isotype control (LTF-2)             | BioXCell              | Cat#BE0090-1MG                     | 0.2mg/ml (in vivo)       |
| <b>Non-antibody staining reagents</b>                   |                       |                                    |                          |
| LIVE/DEAD Fixable Near-IR Dye                           | Molecular Probes      | Cat#L10119                         | 1:1000                   |
| Annexin V APC                                           | BioLegend             | Cat#640920                         | 1:25                     |
| Alexa Fluor 546 Phalloidin                              | Molecular Probes      | Cat#A22283                         | 1:200                    |
| Rhodamine Phalloidin                                    | Molecular Probes      | Cat#R415                           | 1:50                     |
| CellFIX                                                 | BD                    | Cat#340181                         | 1:10                     |
| CountBright beads                                       | Invitrogen            | Cat#C36950                         | 5000/sample              |
| Annexin V Binding Buffer                                | BioLegend             | Cat#422201                         | Neat                     |
| Streptavidin-HRP                                        | R&D Systems           | Cat#890803                         | 1:200                    |
| Toluidine Blue                                          | Sigma-Aldrich         | Cat# 89640-5G                      | 0.1% (w/v)               |

**Supplementary Table 4: Commercial kits and reagents used in tissue processing and nucleic acid analysis.**

| <b>Reagent</b>                                         | <b>Source</b>      | <b>Identifier</b> |
|--------------------------------------------------------|--------------------|-------------------|
| TMB Substrate Reagent set                              | BD                 | Cat#555214        |
| DNeasy Blood and Tissue kit                            | Qiagen             | Cat#69504         |
| RNeasy Mini kit                                        | Qiagen             | Cat#74106         |
| RNeasy Micro Plus kit                                  | Qiagen             | Cat#74034         |
| RNase-free DNase set                                   | Qiagen             | Cat#79254         |
| Superscript II Reverse Transcriptase                   | Invitrogen         | Cat#18064014      |
| dNTP Set                                               | Invitrogen         | Cat#10297018      |
| Anchored Oligo(dT)20 Primer                            | Invitrogen         | Cat#12577011      |
| PowerUp SYBR Green Master Mix                          | Applied Biosystems | Cat#A25777        |
| Trypsin from bovine pancreas                           | Sigma-Aldrich      | Cat#T1005-5G      |
| TrypLE Express                                         | Gibco              | Cat#12604013      |
| DNase 1 from bovine pancreas                           | Roche              | Cat#11284932001   |
| DMEM, high glucose                                     | Gibco              | Cat#41965062      |
| RPMI 1640                                              | Gibco              | Cat#21875091      |
| Chromium Single Cell 3' GEM, Library & Gel Bead Kit v3 | 10x Genomics       | Cat#PN-1000075    |
| Ovation RNA-Seq System V2                              | NuGEN              | Cat#7102-32       |
| Ultralow Library System V2                             | NuGEN              | Cat#0344NB-32     |

**Supplementary Table 5: Primer sets used for quantitative PCR.**

| <b>Target</b>   | <b>F primer (5'→3')</b>        | <b>R primer (5'→3')</b> |
|-----------------|--------------------------------|-------------------------|
| <i>Cxcl2</i>    | TGAACAAAGGCAAGGCTAACT<br>G     | CAGGTACGATCCAGGCTTCC    |
| <i>CypA</i>     | CAAATGCTGGACCAAACACAA          | CCATCCAGCCATTCAGTCTTG   |
| <i>Egr1</i>     | CCTATGAGCACCTGACCACA           | TCGTTTGGCTGGGATAACTC    |
| <i>Gzmb</i>     | ACAAAGGCAGGGGAGATCAT           | CGAATAAGGAAGCCCCCACA    |
| <i>Gzmc</i>     | CCCGTCCCTACATGGCATATT          | GCTTTTGCCACAGGGATGAT    |
| <i>Gzmf</i>     | CAGGGCATGTTTGCAGTGTG           | CCGGAGTCACCACTGTAAGTAGA |
| <i>Havcr2</i>   | AGACATCAAAGCAGCCAAGGT          | TCCGTGGTTAGGGTTCTTGG    |
| <i>Il2rb</i>    | TAAAGACCTGCGACTTCCATC          | AGTGAGAGACCTGGGAGAC     |
| <i>Il13</i>     | GCCAGGTCCACACTCCATA            | GCTTATTGAGGAGCTGAGCAA   |
| <i>Krt1</i>     | CTAAGTTTTGGGTCCGGGTT           | AGTTTGCCTCCTTCATCGAC    |
| <i>Krt5</i>     | CCTGCAGAAGGCCAAGCA             | TGGTGTTTCATGAGCTCCTGGT  |
| <i>Krt10</i>    | GCCTCCTACATGGACAAAGTC          | GCTTCTCGTACCACTCCTTGA   |
| <i>Krt14</i>    | GCAGTATCCGATCTCTTCATGC         | GGCCCTCGAATCCTCTGACT    |
| <i>Lor</i>      | GAGGTCTTTCCACAACCCAC           | TCCCTCACTCATCTTCCCTG    |
| <i>Ptpn6</i>    | TGGCCATGCATCAGCCTTGA           | GTCCTAGGGTCTGGTGAGGG    |
| <i>Rps27</i>    | CCTCCCTACGAGAACATGCC           | GACTACCGTTTGTGCATGGC    |
| <i>Rps29</i>    | TTCCTTTCTCCTCGTTGGGC           | TTCAGCCCGTATTTGCGGAT    |
| <i>Skint1</i>   | AAACAAAAGGGAGCTGACCC           | CCCCTCTAAGCCGTTCACTA    |
| <i>Skint2</i>   | GCTACAGGAGTACTTCTCTGTG<br>TTGT | TGGTGCCAAGACTGGCCT      |
| <i>Tgm1</i>     | CCTTGAGCTCCTCATTGGAA           | CCCTTACCCACTGGGATGAT    |
| <i>Tnfrsf9</i>  | CGTGCAGAACTCCTGTGATAAC         | GTCCACCTATGCTGGAGAAGG   |
| <i>Tnfrsf18</i> | AAGGTTTCAGAACGGAAGTG           | GGGTCTCCACAGTGGTACT     |
| <i>Tigit</i>    | TGAAGGTCCAAGAAAGCTCAG          | TAAGCAAATGAGTCCCAGCA    |
| <i>Xcl1</i>     | GACTTCTCCTCCTGACTTTCCT<br>G    | GGACTTCAGTCCCCACACC     |
